# Supplementary material for: Prevalence of Asthma-COPD Overlap in COPD and Severe Asthma Cohorts
Source: Research Square preprint supplement (doi:10.21203/rs.3.rs-851216/v1), 2021-09-13
Supplement: Supplementary file 1 [file b9949a4156a69e4db6b3b553.docx]

Supplement

The names of ethics committees are as follows:

1. KOCOSS : Gacheon University Gil Medical Center, Hallym University Kangnam Sacred Heart Hospital, Gangnam Severance Hospital, Kyung Hee University Hospital at Gangdong, Hallym University Kangdong Sacred Heart Hospital, Kangbuk Samsung Hospital, Kangwon National University Hospital, Konkuk University Hospital, Konkuk University Chungju Hospital, Kyungpook National University Hospital, Gyeongsang National University Hospital, Korea University Guro Hospital, Korea University Anam Hospital, Seoul Eulji Hospital, Dongguk University Gyeongju Hospital, Dongguk University Ilsan Hospital, Keimyung University Dongsan Medical Center, Dong-A University Hospital, Hallym University Dongtan Sacred Heart Hospital, Pusan National University Hospital, Inje University Busan Paik Hospital, The Catholic University of Korea Bucheon St Mary’s Hospital, Soonchunhyang University Hospital Bucheon, Seoul National University Bundang Hospital, Bundang CHA Hospital, Seoul Metropolitan Government Seoul National University Bora-mae Medical Center, Samsung Medical Center, Soonchunhyang University Hospital Seoul, The Catholic University of Korea Seoul St Mary’s Hospital, The Catholic University of Korea St Paul’s Hospital, The Catholic University of Korea St Vincent’s Hospital, Severance Hospital, Asan Medical Center, Ajou University Hospital, The Catholic University of Korea Yeouido St Mary’s Hospital, The Catholic University of Korea Uijeongbu St Mary’s Hospital, Yeungnam University Medical Center, Ulsan University Hospital, Wonkwang University Sanbon Hospital, Wonju Severance Christian Hospital, Ewha Womans University Mokding Hospital, Incheon St Mary’s Hospital, Inha University Hospital, Chonnam National University Hospital, Chonbuk National University Hospital, Jeju National University Hospital, Soonchunhyang University Hospital Cheonan, Hallym University Chuncheon Sacred Heart Hospital, Hallym University Sacred Heart Hospital, and Hanyang University Guri Hospital.

2. KoSAR



        



Gachon University Gil Medical Center, Chonnam National University Hospital, Kangwon National University Hospital, CHA Bundang Medical Center, Ewha Womans University Medical Center, Korea University Anam Hospital, Nowon Eulji Medical Center, Chonbuk National University Hospital, Kyungpook National University Hospital, Hallym University Sacred Heart Hospital, Dong-A University Hospital, Hanyang University Guri Hospital, Soonchunhyang University Hospital Bucheon, Ajou University Hospital, Seoul National University Hospital, Kangdong Sacred Heart Hospital, Kyunghee University Hospital, Seoul National University Boramae Medical Center, Asan Medical Center, Konkuk university Medical Center, Hanyang University Seoul Hospital, Samsung Medical Center, Severance Hospital, Seoul St. Mary’s Hospital, Ulsan University Hospital, Soonchunhyang University Hospital Bucheon, Seoul National University Bundang Hospital, Chung-Ang University Hospital, Asan Medical Center, and Yeungnam University Medical Center.
